# Supplementary material for: Differential expression and bioinformatics analysis of circRNA in osteosarcoma
Source: Oxford University Press journal article supplement (doi:10.1042/bsr20181514), 2019-04-29
Supplement: bsr-2018-1514_supp.pdf [file bsr-2018-1514_supp.pdf]

## Supplementary Tables

**Table 1.** Characteristics of the patients with osteosarcoma

| Characteristics             |            |
|-----------------------------|------------|
| <b>Age, (year)</b>          |            |
| <b>Mean ± SD</b>            | 17.2 ± 5.6 |
| <b>Range</b>                | 9-26       |
| <b>Sex</b>                  |            |
| <b>Male</b>                 | 6 (46.1)   |
| <b>Female</b>               | 7 (53.9)   |
| <b>Ethnicity</b>            |            |
| <b>Han</b>                  | 9 (69.2)   |
| <b>Minority</b>             | 4 (30.8)   |
| <b>Smoking status</b>       |            |
| <b>No</b>                   | 12 (92.3)  |
| <b>Yes</b>                  | 1 (7.7)    |
| <b>Drinking status</b>      |            |
| <b>No</b>                   | 11 (84.6)  |
| <b>Yes</b>                  | 2 (15.4)   |
| <b>Tumour location</b>      |            |
| <b>Femur, n (%)</b>         | 6 (46.1)   |
| <b>Tibia, n (%)</b>         | 3 (23.1)   |
| <b>Humeral bone, n (%)</b>  | 4 (30.8)   |
| <b>Enneking stage</b>       |            |
| <b>I, n (%)</b>             | 4 (30.8)   |
| <b>II, n (%)</b>            | 9 (69.2)   |
| <b>Tumour size</b>          |            |
| <b>≤5 cm, n (%)</b>         | 4 (30.8)   |
| <b>&gt;5 cm, n (%)</b>      | 9 (69.2)   |
| <b>Pathological subtype</b> |            |
| <b>Osteoblastic type</b>    | 7 (53.8)   |
| <b>Chondroblastic type</b>  | 3 (23.1)   |
| <b>Fibroblastic type</b>    | 2 (15.4)   |
| <b>Telangiectatic type</b>  | 1 (7.7)    |

**Table 2.** Primers and DNA sequences used in this study

| Primer name          | Primer Sequence (5'-3')   |
|----------------------|---------------------------|
| <b>GAPDH-hF</b>      | TGACAACCTTTGGTATCGTGGAAGG |
| <b>GAPDH-hR</b>      | AGGCAGGGATGATGTTCTGGAGAG  |
| <b>circ_32279-hF</b> | TTGCAGTGTATGTTGTCGGGTA    |
| <b>circ_32279-hR</b> | TGAGTCACAAGCAACATCTGA     |
| <b>circ_24831-hF</b> | CCAGCCTGTCTACATCAA        |
| <b>circ_24831-hR</b> | TAAATCCGTGCTTCTCC         |
| <b>circ_2137-hF</b>  | TAGACTAATAAGTGACAGGGTT    |
| <b>circ_2137-hR</b>  | TGTTGGAAGTGAGGGT          |
| <b>circ_6798-hF</b>  | CAGGGACGGCTTGATGG         |
| <b>circ_6798-hR</b>  | GCGAAGACAAAGTCGAGGG       |
| <b>circ_20403-hF</b> | CTTACCCAGAAATACCCAC       |
| <b>circ_20403-hR</b> | TTTCCTGGATAGACCTGTTG      |

**Table 3.** The ten circRNAs with the largest difference in expression (upregulation, downregulation)

| circ_name         | location                   | geneName  | logFC    | logCPM   | F        | P value  | FDR      |
|-------------------|----------------------------|-----------|----------|----------|----------|----------|----------|
| <b>circ_32279</b> | chr7:32672154-32678977:-   | DPY19L1P1 | -8.8794  | 7.865574 | 32.37816 | 1.28E-08 | 5.88E-05 |
| <b>circ_24831</b> | chr6:149208121-149285699:+ | UST       | -8.64624 | 6.850988 | 20.56511 | 5.78E-06 | 0.010905 |
| <b>circ_21841</b> | chr12:50824277-50835426:+  | LARP4     | -8.45639 | 6.593937 | 16.61752 | 4.58E-05 | 0.029042 |
| <b>circ_21890</b> | chr12:66603235-66611015:+  | IRAK3     | -8.42778 | 6.744892 | 18.7573  | 1.49E-05 | 0.015392 |
| <b>circ_22692</b> | chr17:48814320-48819092:+  | LUC7L3    | -8.23093 | 6.407996 | 14.53618 | 0.000138 | 0.059889 |
| <b>circ_8523</b>  | chr14:71880664-71996087:+  | SIPA1L1   | 8.451599 | 6.765993 | 18.73325 | 1.51E-05 | 0.015392 |
| <b>circ_2138</b>  | chr13:64576517-64608670:-  | AK057471  | 8.512857 | 6.795144 | 19.34833 | 1.09E-05 | 0.012547 |
| <b>circ_2137</b>  | chr13:64564228-64608670:-  | AK057471  | 8.579295 | 6.934739 | 20.5156  | 5.93E-06 | 0.010905 |
| <b>circ_6798</b>  | chr16:29917108-29917448:+  | ASPHD1    | 9.122766 | 8.217934 | 40.84021 | 1.67E-10 | 1.54E-06 |
| <b>circ_20403</b> | chr2:106774513-106782539:- | UXS1      | 10.33314 | 8.42944  | 48.26512 | 3.79E-12 | 6.96E-08 |

**Table 4.** The miRNA frequency

| miRNA           | Frequency |
|-----------------|-----------|
| hsa-miR-4691-5p | 24        |
| hsa-miR-4731-5p | 23        |
| hsa-miR-3692-5p | 22        |
| hsa-miR-6764-5p | 22        |
| hsa-miR-8089    | 22        |
| hsa-miR-6851-5p | 21        |
| hsa-miR-4685-5p | 20        |
| hsa-miR-762     | 20        |
| hsa-miR-3064-5p | 19        |
| hsa-miR-5193    | 19        |

**Table 5.** The circRNA information in the network diagram

| circ_name  | location                   | Host_geneName | isoformName     | Regulate |
|------------|----------------------------|---------------|-----------------|----------|
| circ_2137  | chr13:64564228-64608670:-  | AK057471      | uc001vii.1      | UP       |
| circ_23401 | chr18:6263945-6312055:-    | L3MBTL4       | ENST00000400105 | DOWN     |
| circ_2138  | chr13:64576517-64608670:-  | AK057471      | uc001vii.1      | UP       |
| circ_20486 | chr2:122260742-122287901:- | CLASP1        | uc010yyy.2      | UP       |
| circ_2868  | chr12:70193988-70195501:+  | RAB3IP        | ENST00000247833 | DOWN     |
| circ_8917  | chr19:2213537-2214595:+    | DOT1L         | ENST00000398665 | UP       |
| circ_18566 | chr4:183245098-183268082:+ | TENM3         | ENST00000513201 | UP       |
| circ_32537 | chr1:17668437-17668897:+   | PADI4         | uc009vpc.2      | DOWN     |
| circ_24851 | chr6:154520801-154535410:- | IPCEF1        | NM_001130699    | DOWN     |
| circ_16365 | chr6:145148746-145157074:+ | UTRN          | NM_007124       | DOWN     |
| circ_3517  | chr11:6962801-6977013:+    | ZNF215        | uc001mez.1      | DOWN     |
| circ_10351 | chr7:23381682-23391205:-   | IGF2BP3       | NM_006547       | UP       |
| circ_15993 | chr6:47251673-47254331:-   | TNFRSF21      | NM_014452       | UP       |
| circ_5670  | chr17:34881058-34884033:-  | MYO19         | ENST00000431794 | UP       |
| circ_23338 | chr19:8619360-8619627:-    | MYO1F         | NM_012335       | DOWN     |
| circ_15000 | chr9:88233897-88248289:-   | AGTPBP1       | uc004aod.4      | DOWN     |
